# Supplementary material for: A multiplex guide RNA expression system and its efficacy for plant genome engineering
Source: PubMed Central journal article supplement (PMC7069183; doi:10.1186/s13007-020-00580-x), 2020-03-12
Supplement: 13007_2020_580_MOESM1_ESM.pdf [file 13007_2020_580_MOESM1_ESM.pdf]

# Additional file 1

## a NaNEC5b

|             |  | gRNA20                                 | gRNA21 |                          |     |
|-------------|--|----------------------------------------|--------|--------------------------|-----|
| WT          |  | TTTTGGGCATAAGAGGAGGCTGGAGGCAA          | //     | TTCTTGCATGGAAAATCAAATGGC |     |
|             |  | Total Indel % (Total Large Deletion %) |        | 10.1 (8.7)               |     |
| Replicate 1 |  | TTTTGGGCATAAGAGGAGG                    | / /    | AAATGGC                  | 5.1 |
|             |  | TTTTGGGCATAAGAGGAGG                    |        | AATGGC                   | 2.9 |
|             |  | TTTTGGGCATAAGAGGA - -                  |        | AATGGC                   | 0.3 |
|             |  | Total Indel % (Total Large Deletion %) |        | 5.6 (5.1)                |     |
| Replicate 2 |  | TTTTGGGCATAAGAGGAGG                    | / /    | AAATGGC                  | 2.6 |
|             |  | TTTTGGGCATAAGAGGAGG                    |        | AATGGC                   | 1.9 |
|             |  | Total Indel % (Total Large Deletion %) |        | 6.9 (6.2)                |     |
| Replicate 3 |  | TTTTGGGCATAAGAGGAGG                    | / /    | AATGGC                   | 2.7 |
|             |  | TTTTGGGCATAAGAGGAGG                    |        | AAATGGC                  | 2.5 |

## b NaNEC3a

|             |  | gRNA4                                  | gRNA5 |                          |     |
|-------------|--|----------------------------------------|-------|--------------------------|-----|
| WT          |  | AATAGTTGAAGATACAATGAGGATGGCAG          | //    | TCTTGAAGATCTGGAGAAGTTGGT |     |
|             |  | Total Indel % (Total Large Deletion %) |       | 6.9 (5.9)                |     |
| Replicate 1 |  | AATAGTTGAAGATACAATGA                   | / /   | AGTTGGT                  | 4.5 |
|             |  | AATAGTTGAAGATACAATGA                   |       | TAGTTGGT                 | 0.5 |
|             |  | AATAGTTGAAGATACAATGA                   |       | AAGTTGGT                 | 0.5 |
|             |  | Total Indel % (Total Large Deletion %) |       | 5.5 (4.3)                |     |
| Replicate 2 |  | AATAGTTGAAGATACAATGA                   | / /   | AGTTGGT                  | 3.8 |
|             |  | AATAGTTGAAGATACAATGA                   |       | AAGTTGGT                 | 0.3 |
|             |  | Total Indel % (Total Large Deletion %) |       | 6.9 (6.1)                |     |
| Replicate 3 |  | AATAGTTGAAGATACAATGA                   | / /   | AGTTGGT                  | 5.3 |
|             |  | AATAGTTGAAGATACAAT - -                 |       | AGTTGGT                  | 0.2 |
|             |  | AATAGTTGAAGATACAATGA                   |       | CAGTTGGT                 | 0.2 |

## c NaAOC

|             |  | gRNA4                                  | gRNA2 |                         |      |
|-------------|--|----------------------------------------|-------|-------------------------|------|
| WT          |  | TACGAGCTCAATGAACGTGACCGTGGTAG          | //    | CCAAAAGACTGTCAATTCCTTGA |      |
|             |  | Total Indel % (Total Large Deletion %) |       | 14.8 (13.7)             |      |
| Replicate 1 |  | TACGAGCTCAATGAACGTGA                   | / /   | CCTTGA                  | 12.8 |
|             |  | TACGAGCTCAATGAACGTG -                  |       | CCTTGA                  | 0.5  |
|             |  | Total Indel % (Total Large Deletion %) |       | 18.5 (16.8)             |      |
| Replicate 2 |  | TACGAGCTCAATGAACGTGA                   | / /   | CCTTGA                  | 16.3 |
|             |  | TACGAGCTCAATGAACGTG -                  |       | CCTTGA                  | 0.4  |

## d NaMYC2

|             |  | gRNA2                                  | gRNA3 |                          |     |
|-------------|--|----------------------------------------|-------|--------------------------|-----|
| WT          |  | TTGTATTCCTTCAGCAAACGGCGTGGTTG          | //    | AGAGTTCGATCTCATGAACAAGGT |     |
|             |  | Total Indel % (Total Large Deletion %) |       | 6.4 (5.6)                |     |
| Replicate 1 |  | TTGTATTCCTTCAGCAAAC -                  | / /   | ACAAGGT                  | 2.2 |
|             |  | TTGTATTCCTTCAGCAAACG                   |       | ACAAGGT                  | 2   |
|             |  | Total Indel % (Total Large Deletion %) |       | 2 (1.7)                  |     |
| Replicate 2 |  | TTGTATTCCTTCAGCAAACG                   | / /   | ACAAGGT                  | 1   |
|             |  | TTGTATTCCTTCAGCAAAC -                  |       | ACAAGGT                  | 0.1 |
|             |  | Total Indel % (Total Large Deletion %) |       | 18.6 (16)                |     |
| Replicate 3 |  | TTGTATTCCTTCAGCAAACG                   | / /   | ACAAGGT                  | 4   |
|             |  | TTGTATTCCTTCAGCAAAC -                  |       | ACAAGGT                  | 3.5 |
|             |  | TTGTATTCCTTCAGCAAACG                   |       | AACAAGGT                 | 2.6 |
|             |  | Total Indel % (Total Large Deletion %) |       | 8.7 (7.3)                |     |
| Replicate 4 |  | TTGTATTCCTTCAGCAAACG                   | / /   | ACAAGGT                  | 2.4 |
|             |  | TTGTATTCCTTCAGCAAACG                   |       | AACAAGGT                 | 1.1 |
|             |  | TTGTATTCCTTCAGCAAAC -                  |       | ACAAGGT                  | 1   |
|             |  | Total Indel % (Total Large Deletion %) |       | 10.6 (9.4)               |     |
| Replicate 5 |  | TTGTATTCCTTCAGCAAACG                   | / /   | ACAAGGT                  | 2.6 |
|             |  | TTGTATTCCTTCAGCAAAC -                  |       | ACAAGGT                  | 1.3 |
|             |  | TTGTATTCCTTCAGCA - - - -               |       | ACAAGGT                  | 0.8 |

## e NaNEC1c

|             |  | gRNA2                                  | gRNA1 |                            |     |
|-------------|--|----------------------------------------|-------|----------------------------|-----|
| WT          |  | CTAGGATCAAAGGAAGAACCAAAAGGAAA          | //    | AACAATGACTAAGATAATTGTGAGGC |     |
|             |  | Total Indel % (Total Large Deletion %) |       | 5.3 (4.4)                  |     |
| Replicate 1 |  | CTAGGATCAAAGGAAGAACC                   | / /   | GTGAGGC                    | 2.2 |
|             |  | CTAGGATCAAAGGAAGAACC                   |       | TGTGAGGC                   | 0.6 |
|             |  | CTAGGATCAAAGGA - - - - -               |       | TGTGAGGC                   | 0.5 |
|             |  | Total Indel % (Total Large Deletion %) |       | 11.3 (9.6)                 |     |
| Replicate 2 |  | CTAGGATCAAAGGAAGAACC                   | / /   | GTGAGGC                    | 7.7 |
|             |  | CTAGGATCAAAGGAAGAACC -                 |       | TGTGAGGC                   | 1.3 |
|             |  | CTAGGATCAAAG - - - - -                 |       | TGTGAGGC                   | 0.3 |
|             |  | Total Indel % (Total Large Deletion %) |       | 9.7 (7.2)                  |     |
| Replicate 3 |  | CTAGGATCAAAGGAAGAACC                   | / /   | GTGAGGC                    | 4.3 |
|             |  | CTAGGATCAAAGGAAGAACC -                 |       | TGTGAGGC                   | 1   |
