# Supplementary material for: A multiplex guide RNA expression system and its efficacy for plant genome engineering
Source: PubMed Central journal article supplement (PMC7069183; doi:10.1186/s13007-020-00580-x), 2020-03-12
Supplement: 13007_2020_580_MOESM3_ESM.pdf [file 13007_2020_580_MOESM3_ESM.pdf]

## Additional file 3

### NaNEC1c

WT CTGCAGACTTGGAGT // AAGGAAGAACC CAAAAGGAAA // TAAGATAATTGTGAGGC

gRNA3
gRNA2
gRNA1

**a**

|             |                                | Total Indel % (Total Large Deletion %)       |               |
|-------------|--------------------------------|----------------------------------------------|---------------|
| Replicate 1 | CTGCAG                         | -----//-----                                 | TGTGAGGC 10   |
|             | CTGCAG                         | -----//-----                                 | GTGAGGC 1.0   |
|             | CTGCAG                         | -----//----- CAAAAGGAAA // TAAGATAATTGTGAGGC | 0.9           |
|             | CTGCAGACTTGGAGT // AAGGAAGAACC | -----//-----                                 | GTGAGGC 0.8   |
|             |                                | Total Indel % (Total Large Deletion %)       | 19.6 (16.7)   |
| Replicate 2 | CTGCAG                         | -----//-----                                 | TGTGAGGC 16.8 |
|             | CTGCAG                         | -----//-----                                 | GTGAGGC 1.7   |
|             | CTGCAGACTTGGAGT // AAGGAAGAACC | -----//-----                                 | GTGAGGC 1.5   |
|             | CTGCAG                         | -----//----- CAAAAGGAAA // TAAGATAATTGTGAGGC | 1.1           |
|             |                                | Total Indel % (Total Large Deletion %)       | 25.8 (21.5)   |
| Replicate 3 | CTGCAG                         | -----//-----                                 | TGTGAGGC 11.2 |
|             | CTGCAGACTTGGAGT // AAGGAAGAACC | -----//-----                                 | GTGAGGC 1.1   |
|             | CTGCAG                         | -----//-----                                 | GTGAGGC 0.9   |
|             | CTGCAG                         | -----//----- CAAAAGGAAA // TAAGATAATTGTGAGGC | 0.4           |
|             |                                | Total Indel % (Total Large Deletion %)       | 17.9 (14)     |

**b**

|                   |                                                                |                                              |               |
|-------------------|----------------------------------------------------------------|----------------------------------------------|---------------|
| T <sub>0-8</sub>  | CTGCAG                                                         | -----//-----                                 | TGTGAGGC 14.1 |
|                   | CTGCAG                                                         | -----//----- CAAAAGGAAA // TAAGATAATTGTGAGGC | 0.9           |
|                   |                                                                | Total Indel % (Total Large Deletion %)       | 23.1 (15.6)   |
| T <sub>0-9</sub>  | CTGCAG                                                         | -----//-----                                 | TGTGAGGC 62.7 |
|                   | CTGCAGACTTGGAGT // AAGGAAGAACC                                 | -----//-----                                 | GTGAGGC 0.1   |
|                   | CTGCAG                                                         | -----//----- CAAAAGGAAA // TAAGATAATTGTGAGGC | 0.0           |
|                   |                                                                | Total Indel % (Total Large Deletion %)       | 69.6 (62.9)   |
| T <sub>0-10</sub> | CTGCAG                                                         | -----//-----                                 | TGTGAGGC 69.4 |
|                   | CTGCAGCACTTGGAGT / AAGGAAGAACC CAAAAGGAAA // TAAGATAATTGTGAGGC | -----//-----                                 | 22.9          |
|                   |                                                                | Total Indel % (Total Large Deletion %)       | 99.5 (69.4)   |
