# Supplementary material for: A multiplex guide RNA expression system and its efficacy for plant genome engineering
Source: PubMed Central journal article supplement (PMC7069183; doi:10.1186/s13007-020-00580-x), 2020-03-12
Supplement: 13007_2020_580_MOESM4_ESM.pdf [file 13007_2020_580_MOESM4_ESM.pdf]

## Additional file 4

### NaNEC1c

|                       | gRNA3                         | gRNA2                    | gRNA1         |                    |      |
|-----------------------|-------------------------------|--------------------------|---------------|--------------------|------|
| WT                    | CTGCAG- <del>ACTTGG</del> AGT | // AAGGAAGAACCAAAAAGGAAA | //            | TAAGATAATTGTGAGGC  |      |
|                       |                               |                          |               | Total Indel %      | 21.6 |
| T <sub>0</sub> -1     | CTGCAGAACTTGGAGT              | // AAGGAAGAACCAAAAAGGAAA | //            | TAAGATAATTGTGAGGC  | 21.2 |
|                       |                               |                          |               | Total Indel %      | 64.7 |
| T <sub>0</sub><br>-2  | CTGCAGTACTTGGAGT              | // AAGGAAGAACCAAAAAGGAAA | //            | TAAGATAA- -GTGAGGC | 26.4 |
|                       | CTGCAGTACTTGGAGT              | // AAGGAAGAACCAAAAAGGAAA | //            | TAAGATAATTGTGAGGC  | 13.2 |
|                       | CTGCAG-ACTTGGAGT              | // AAGGAAGAACCAAAAAGGAAA | //            | TAAGATAA- -GTGAGGC | 8.9  |
|                       |                               |                          |               | Total Indel %      | 96.9 |
| T <sub>0</sub><br>-5  | CTGCAGTACTTGGAGT              | // AAGGAAGAACCAAAAAGGAAA | //            | TAAGATAATTGTGAGGC  | 28.4 |
|                       | CTGCAGAACTTGGAGT              | // AAGGAAGAACCAAAAAGGAAA | //            | TAAGATAATTGTGAGGC  | 23.6 |
|                       | CTGCAGTACTTGGAGT              | // AAGGAAGAACCAAAAAGGAAA | //            | TAAGAT- - -GTGAGGC | 10.5 |
|                       |                               |                          |               | Total Indel %      | 96.2 |
| T <sub>0</sub><br>-7  | CTGCAGAACTTGGAGT              | // AAGGAAGAACCAAAAAGGAAA | //            | TAAGATAATTGTGAGGC  | 44.5 |
|                       | CTGCAGTACTTGGAGT              | // AAGGAAGAACCAAAAAGGAAA | //            | TAAGATAATTGTGAGGC  | 19.9 |
|                       | CTGCAG                        | -----/ /-----            |               | TGTGAGGC           | 1.5  |
|                       |                               |                          |               | Total Indel %      | 48.2 |
| T <sub>0</sub><br>-11 | CTGCAGTACTTGGAGT              | // AAGGAAGAACCAAAAAGGAAA | //            | TAAGATAATTGTGAGGC  | 25.2 |
|                       | CTGCAG-ACTTGGAGT              | // AAGGAA                | -----/ /----- | GAGGC              | 4.5  |
|                       | CTGCAGAACTTGGAGT              | // AAGGAAGAACCAAAAAGGAAA | //            | TAAGATAATTGTGAGGC  | 3.8  |
