# Supplementary material for: A multiplex guide RNA expression system and its efficacy for plant genome engineering
Source: PubMed Central journal article supplement (PMC7069183; doi:10.1186/s13007-020-00580-x), 2020-03-12

## Additional file 5

### a NaNEC1c

|                |                                                                                                       |                                      |                    |                    |
|----------------|-------------------------------------------------------------------------------------------------------|--------------------------------------|--------------------|--------------------|
|                | gRNA3                                                                                                 | gRNA2                                | gRNA1              |                    |
| WT             | CTGCAG- <del>ACTTGG</del> AAGT // AAGGAAGAACC <del>AAAAGG</del> AAA // TAAGATAATT <del>GTG</del> AGGC |                                      |                    |                    |
|                |                                                                                                       |                                      |                    | Total Indel % 83.3 |
| T <sub>0</sub> | CTGCAGTACTTGGAGT                                                                                      | AAGGAAGAACC <del>AAAAGG</del> AAA // | TAAGATAA- -GTGAGGC | 26.4               |
| -2             | CTGCAG- <del>ACTTGG</del> AAGT //                                                                     | AAGGAAGAACC <del>AAAAGG</del> AAA // | TAAGATAA- -GTGAGGC | 8.9                |
|                |                                                                                                       | ⋮                                    |                    |                    |
|                | CTGCAG- <del>ACTTGG</del> AAGT //                                                                     | AAGGAAGAACC-----                     | -----GTGAGGC       | 0.02               |

### b

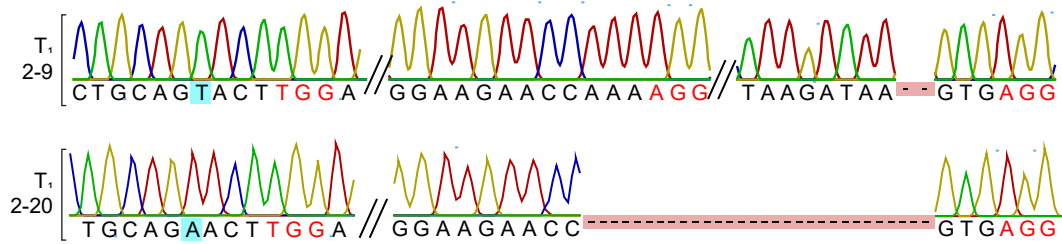

Supplement: 13007_2020_580_MOESM5_ESM.pdf [file 13007_2020_580_MOESM5_ESM.pdf]
