# Supplementary material for: A multiplex guide RNA expression system and its efficacy for plant genome engineering
Source: PubMed Central journal article supplement (PMC7069183; doi:10.1186/s13007-020-00580-x), 2020-03-12
Supplement: 13007_2020_580_MOESM6_ESM.pdf [file 13007_2020_580_MOESM6_ESM.pdf]

## Additional file 6

### NaNEC1c

|        |    | gRNA2                                                           | gRNA1     |    |                           |      |
|--------|----|-----------------------------------------------------------------|-----------|----|---------------------------|------|
|        |    | CTAGGATCAAAGGAAGAACC                                            | AAAAGGAAA | // | ACAATGACTAAGATAATTGTGAGGC |      |
|        |    | Total Indel %                                                   |           |    |                           | 98.4 |
| Callus | -1 | CTAGGATCAAAGGAAGAACC -----//-----TGTGAGGC                       |           |    |                           | 97.6 |
|        |    | CTAGGATCAAAGGAAGAACC AAAAGGAAA // ACAATGACTAAGATAAT-GTGAGGC     |           |    |                           | 0.5  |
|        |    | Total Indel %                                                   |           |    |                           | 98.8 |
| Callus | -2 | CTAGGATCAAAG -----//-----ATA--TGTGAGGC                          |           |    |                           | 71.3 |
|        |    | -----//-----ACAATGACTAAGATAAT-GTGAGGC                           |           |    |                           | 14.6 |
|        |    | -----//-----AAAAGGAAA // ACAATGACTAAGATAA--GTGAGGC              |           |    |                           | 10.8 |
|        |    | Total Indel %                                                   |           |    |                           | 91.3 |
| Callus | -3 | CTAGGATCAAAGGAAGAACC -----//-----TGTGAGGC                       |           |    |                           | 75.1 |
|        |    | CTAGGATCAAAGGA - - - - - AAAAGGAAA // ACAATGACTAAGATAATTGTGAGGC |           |    |                           | 6.3  |
|        |    | CTAGGATCAAAGGAAGAACC -----//-----GTGAGGC                        |           |    |                           | 0.9  |
|        |    | Total Indel %                                                   |           |    |                           | 84.8 |
| Callus | -4 | CTAGGAT -----//-----AATTGTGAGGC                                 |           |    |                           | 61.9 |
|        |    | CTAGGATCAAAGGAAGAAC -AAAAGGAAA // ACAATGACTAAGATAATTGTGAGGC     |           |    |                           | 15.2 |
|        |    | CTAGGATCAAAGGAAGA - -CAAAGGAAA // ACAATGACTAAGATAATTGTGAGGC     |           |    |                           | 3.7  |
|        |    | Total Indel %                                                   |           |    |                           | 88.8 |
| Callus | -5 | CTAGGATCAAAGGAAGA -----//-----TAATTGTGAGGC                      |           |    |                           | 57.2 |
|        |    | CTAGGATCAAAGGAA ----- // ACAATGACTAAGATAAT-----//-----          |           |    |                           | 21.3 |
|        |    | CTAGGATCAAAGGAAGAAC ----- // ACAATGACTAAGATAATTGTGAGGC          |           |    |                           | 3.1  |

### NaEAH1

|        |    | gRNA12                                                      | gRNA14 |    |                          |      |
|--------|----|-------------------------------------------------------------|--------|----|--------------------------|------|
|        |    | ACTATCCGTTCCAGATTCTTCTTC                                    | AGGTAG | // | CATTGGGCAAGTACTCAAAGGGGC |      |
|        |    | Total Indel %                                               |        |    |                          | 90.8 |
| Callus | -1 | ACTATCCGTTCCAGATTCTTCTTCAGGTAG // CATTGGGCAAGTACTCAAAGGGGC  |        |    |                          | 32.4 |
|        |    | ACTATCCGTTCCAGATTCTTCTTCAGGTAG // ATTTGGGCAAGTACTCAAAGGGGC  |        |    |                          | 30.1 |
|        |    | ACTATCCGTTCCAGATTCTTCTTCAGGTAG // CATTGGGCAAGTACTCTAAGGGGC  |        |    |                          | 21.6 |
|        |    | Total Indel %                                               |        |    |                          | 56.9 |
| Callus | -2 | ACTATCCGTTCCAGATTCTTCTTCAGGTAG // CATTGGGCAAGTACTCAAAGGGGC  |        |    |                          | 28.5 |
|        |    | ACTATCCGTTCCAGATTCTTCTTCAGGTAG // CATT-----AAGGGGC          |        |    |                          | 7.8  |
|        |    | ACTATCCGTTCCAGATTCTTCTTCAGGTAG // C-----C                   |        |    |                          | 7.0  |
|        |    | Total Indel %                                               |        |    |                          | 38.4 |
| Callus | -3 | ACTATCCGTTCCAGATTCTTCTTCAGGTAG // CATTGGGCAAGTACTCAAAGGGGC  |        |    |                          | 27.8 |
|        |    | ACTATCCGTTCCAGATTCTTCTTCAGGTAG // CATTGGGCAAGTACT- -AAGGGGC |        |    |                          | 5.5  |
|        |    | ACTATCCGTTCCAGATTCTTCTTCAGGTAG // CATTGGGCAAGTACT -AAGGGGC  |        |    |                          | 1.4  |
|        |    | Total Indel %                                               |        |    |                          | 47.4 |
| Callus | -4 | ACTATCCGTTCCAGATTCTTCTTCAGGTAG // CATTGGGCAAGTACTCAAAGGGGC  |        |    |                          | 34.3 |
|        |    | ACTATCCGTTCCAGATTCTTCTTCAGGTAG // ATTTGGGCAAGTACTCAAAGGGGC  |        |    |                          | 4.0  |
|        |    | ACTATCCGTTCCAGATTCTTCTTCAGGTAG // CATTGGGCAAGTACT -AAGGGGC  |        |    |                          | 2.4  |
|        |    | Total Indel %                                               |        |    |                          | 64.7 |
| Callus | -5 | ACTATCCGTTCCAGATTCTTCTTCAGGTAG // CATTGGGCAAGTACTCAAAGGGGC  |        |    |                          | 44.4 |
|        |    | ACTATCCGTTCCAGATTCTTCTTCAGGTAG // ATTTGGGCAAGTACTCAAAGGGGC  |        |    |                          | 5.4  |
|        |    | ACTATCCGTTCCAGATTCTTCTTCAGGTAG // CATTGGGCAAGTACT -AAGGGGC  |        |    |                          | 4.5  |
